# Supplementary material for: Photobiomodulation attenuates oligodendrocyte dysfunction and prevents adverse neurological consequences in a rat model of early life adversity
Source: PubMed Central journal article supplement (PMC9925323; doi:10.7150/thno.78777), 2023-01-16
Supplement: thnov13p0913s1.pdf [file thnov13p0913s1.pdf]

## **Supplementary Information**

**4 Supplementary Figures**

**1 Supplementary Table**

**A**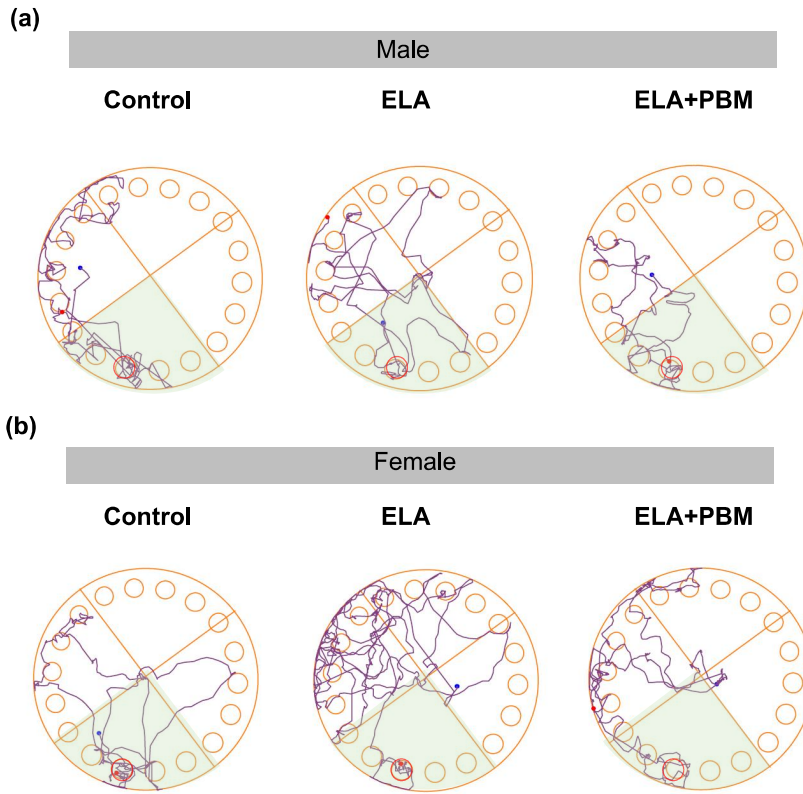**B**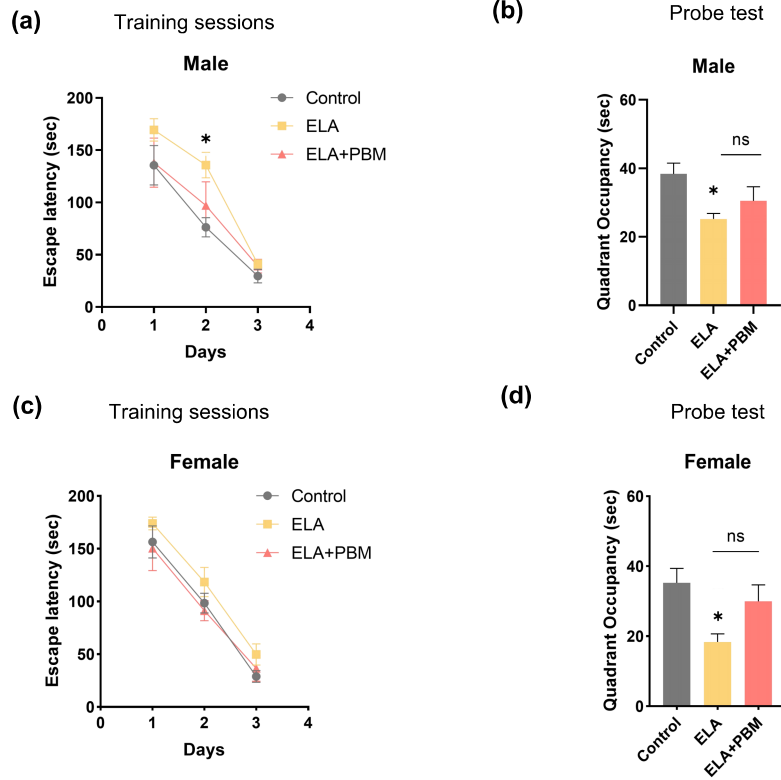

**Figure S1. ELA resulted in spatial memory impairment, which can be partially alleviated by early PBM treatment.** The Barnes maze task was used to assess spatial learning and memory abilities. **A (a, b)** The representative tracking plots of the Barnes maze task. **B** After training sessions, the probe trials were conducted, escape latency curves during the three days of training sessions (**a, c**) and quadrant occupancy time in the probe (**b, d**) were recorded and analyzed. Compared to control rats, ELA-exposed rats spent significantly less time in the target quadrant, and male rats also showed a deficit in spatial learning, early PBM treatment partially alleviated these deficits, but was not significant. All data are presented as mean  $\pm$  SE (n = 5-7). \* P < 0.05 versus Control-group; # P < 0.05 versus ELA-group.

**A****Male**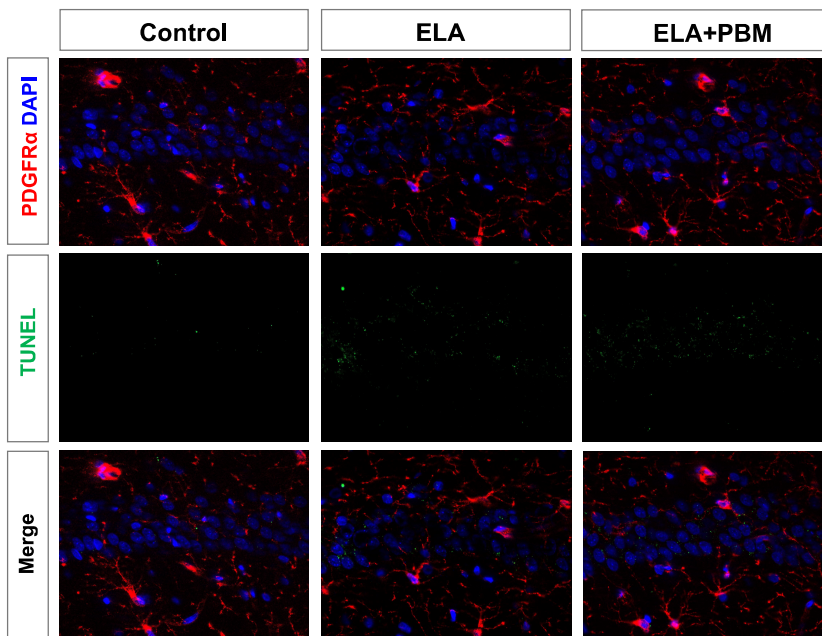**B****Female**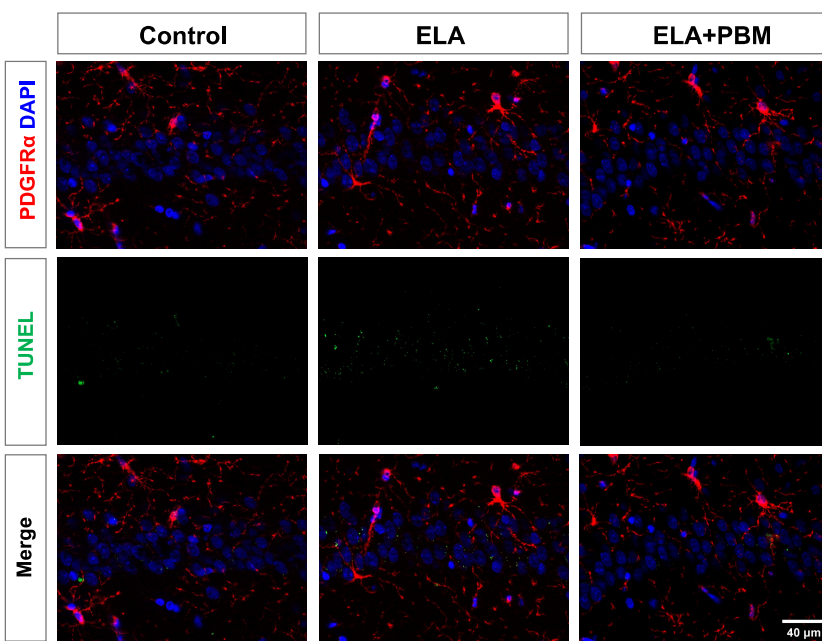

**Figure S2. ELA does not compromise the survival of the OPCs.** TUNEL staining and immunostaining for PDGFR $\alpha$  (a marker of OPCs) with DAPI. In both male (**A**) and female animals (**B**), no appreciable TUNEL<sup>+</sup> PDGFR $\alpha$ <sup>+</sup> cells were observed. Scale bar = 40  $\mu$ m (n = 5-7).

**A**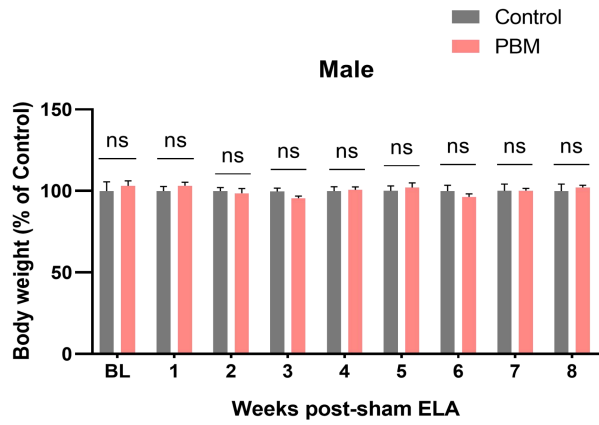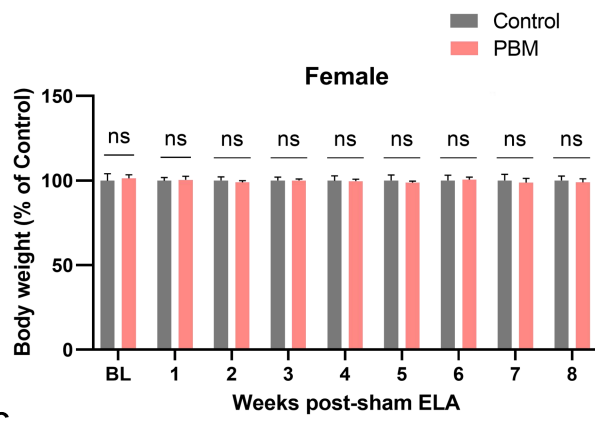**C****(a)** Elevated plus maze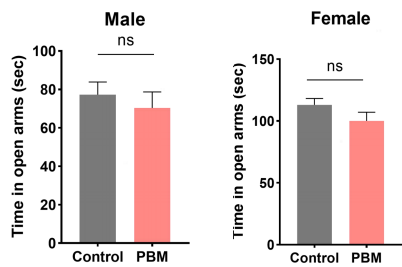**(b)** Tail suspension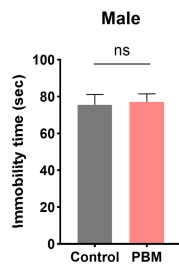**(c)** Forced swimming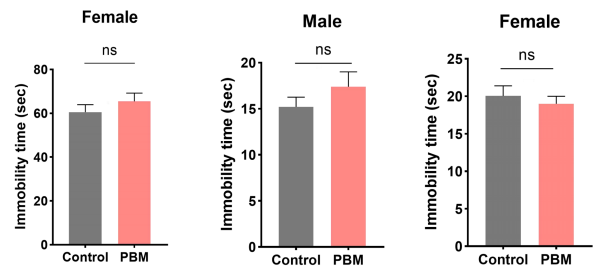**B**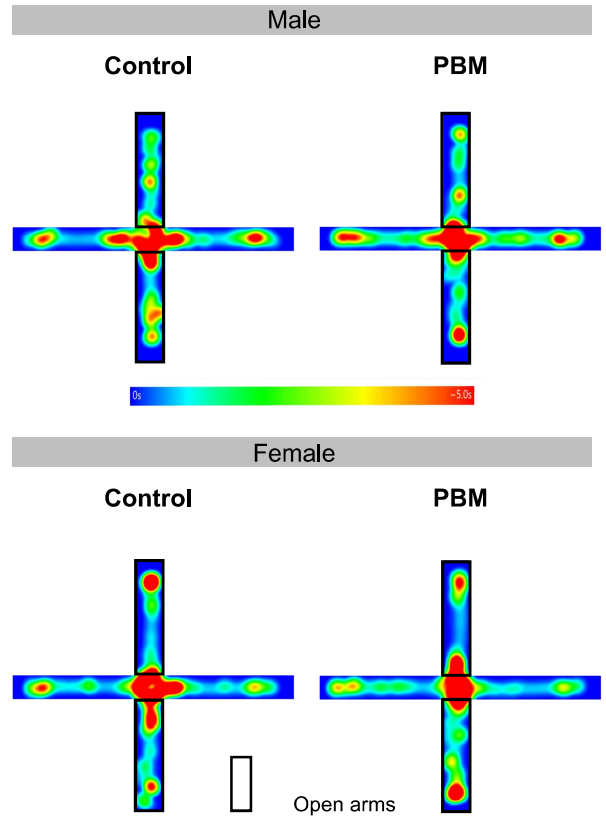

**Figure S3. Early PBM treatment does not affect the levels of anxiety and depression in normal animals.** **A** No significant difference in body weight alternation between the two groups. **B** Representative heat maps of the elevated plus maze test. **C (a)** There was no difference between groups in the time spent in open arms. **C (b)** No differences in immobility time were observed in the tail suspension test. **C (c)** No differences in immobility time were observed in the forced swimming test. All data are presented as mean  $\pm$  SE (n = 6-7).

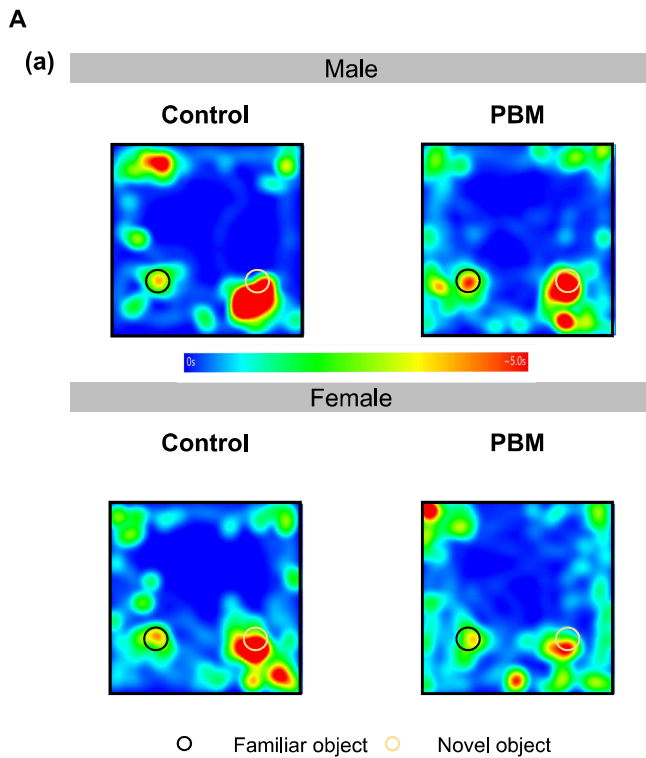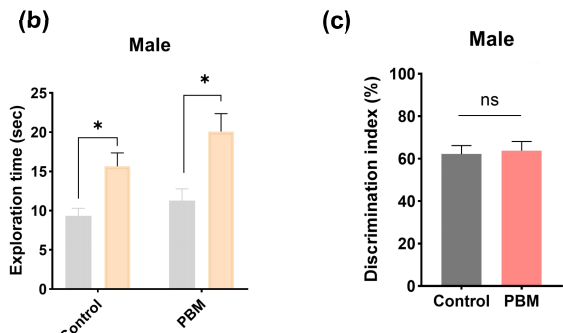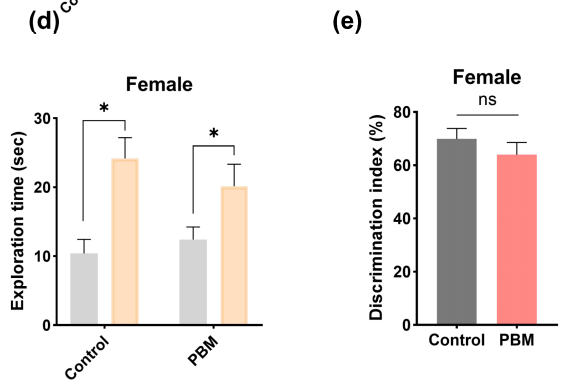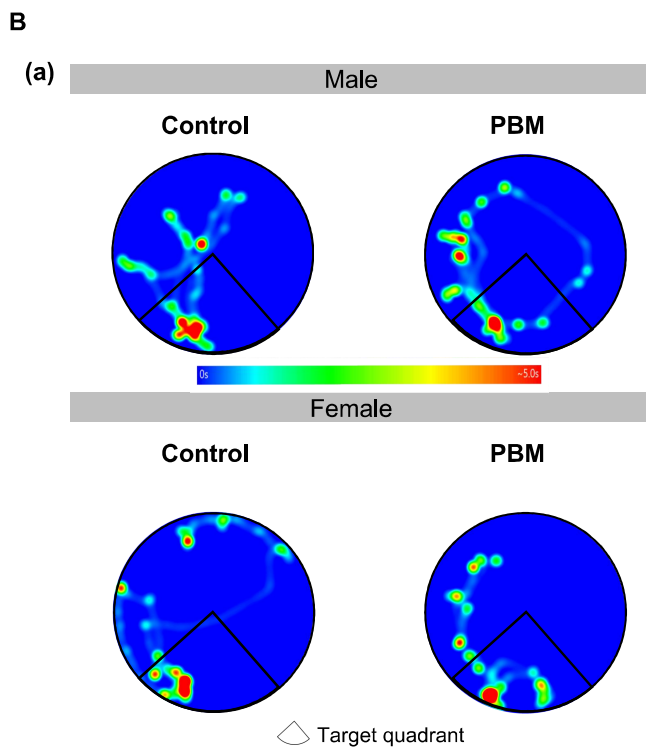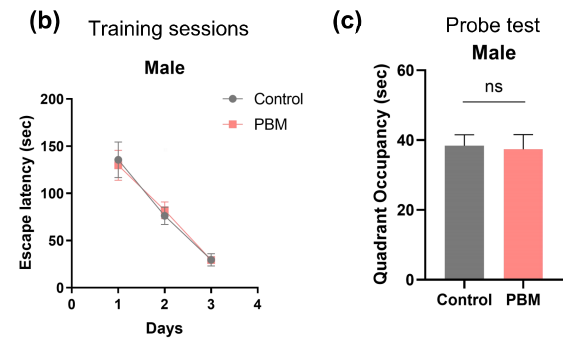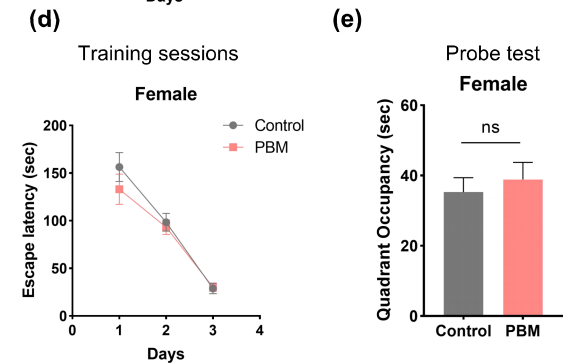



**Figure S4. Early PBM treatment does not affect cognitive performances in normal animals.** **A (a)** Representative heat maps of the novel object recognition test. **A (b, d)** The time spent on the familiar (dark) object and novel object (orange) was calculated and statistically compared. **A (c, e)** No differences in the discrimination index were observed between the two groups. **B (a)** Representative heat maps of the Barnes maze task. **B (b, d)** There was no significant difference in escape latency between the two groups. **B (c, e)** No significant differences in the quadrant occupancy time were observed between the two groups. All data are presented as mean  $\pm$  SE (n = 6-7).

**Table S1. Primary antibodies used in this study**

| Antibody       | Host organism | Vendor                                   | Cat#      | Dilution                              | Application                               |
|----------------|---------------|------------------------------------------|-----------|---------------------------------------|-------------------------------------------|
| Olig2          | Goat          | R&D Systems                              | AF2418-SP | 1:250                                 | IF                                        |
| MBP            | Mouse         | Abcam                                    | ab62631   | 1:300                                 | IF                                        |
| CC1            | Mouse         | EMD Millipore                            | OP80      | 1:500                                 | IF                                        |
| Ki67           | Rabbit        | Thermo Fisher Scientific                 | PA5-19462 | 1:300                                 | IF                                        |
| 4-HNE          | Mouse         | Japan Institute For the Control of Aging | MHN-100P  | 1:200                                 | IF                                        |
| PDGFR $\alpha$ | Rabbit        | Cell Signaling Technology                | #3174     | 1:500 for IF, 1:50 for ProteinSimple® | IF, ProteinSimple® electrophoresis syetem |
| MBP            | Rabbit        | Proteintech                              | 10458-1-A | 1:50                                  | ProteinSimple® electrophoresis syetem     |
| Olig2          | Rabbit        | Abcam                                    | ab109186  | 1:50                                  | ProteinSimple® electrophoresis syetem     |
